# Supplementary material for: Downregulation of MYPT1 increases tumor resistance in ovarian cancer by targeting the Hippo pathway and increasing the stemness
Source: Mol Cancer. 2020 Jan 11;19:7. doi: 10.1186/s12943-020-1130-z (PMC6954568; doi:10.1186/s12943-020-1130-z)
Supplement: Supplementary file 2 — Additional file 2. Gene Ontology (GO) analysis of genes whose expression is correlated with that of MYPT1 and gene expression data from Taqman arrays and heatmaps [file 12943_2020_1130_MOESM2_ESM.xls]

## Sheet: GO_GSE38666
Category	Term	Count	%	PValue	-log pvalue
GOTERM_BP_DIRECT	GO:0015031~protein transport	172	2.93816	1.00678e-08	7.99707
GOTERM_BP_DIRECT	GO:0016925~protein sumoylation	65	1.11035	2.03488e-08	7.69146
GOTERM_BP_DIRECT	GO:0043161~proteasome-mediated ubiquitin-dependent protein catabolic process	98	1.67407	6.28261e-08	7.20186
GOTERM_BP_DIRECT	GO:0006888~ER to Golgi vesicle-mediated transport	81	1.38367	7.88709e-08	7.10308
GOTERM_BP_DIRECT	GO:0051301~cell division	152	2.59652	9.42019e-08	7.02594
GOTERM_BP_DIRECT	GO:0000209~protein polyubiquitination	90	1.53741	1.07919e-07	6.9669
GOTERM_BP_DIRECT	GO:0016567~protein ubiquitination	151	2.57943	1.05981e-06	5.97477
GOTERM_BP_DIRECT	GO:0006351~transcription, DNA-templated	677	11.5647	1.71879e-06	5.76478
GOTERM_BP_DIRECT	GO:0016032~viral process	128	2.18654	2.56119e-06	5.59156
GOTERM_BP_DIRECT	GO:0098609~cell-cell adhesion	117	1.99863	4.401e-06	5.35645
GOTERM_BP_DIRECT	GO:0042787~protein ubiquitination involved in ubiquitin-dependent protein catabolic process	73	1.24701	5.9605e-06	5.22472
GOTERM_BP_DIRECT	GO:0042795~snRNA transcription from RNA polymerase II promoter	40	0.683293	6.33079e-06	5.19854
GOTERM_BP_DIRECT	GO:0006281~DNA repair	103	1.75948	7.90649e-06	5.10202
GOTERM_BP_DIRECT	GO:0060271~cilium morphogenesis	66	1.12743	8.80614e-06	5.05521
GOTERM_BP_DIRECT	GO:0075733~intracellular transport of virus	31	0.529552	1.75167e-05	4.75655
GOTERM_BP_DIRECT	GO:1900034~regulation of cellular response to heat	41	0.700376	1.97857e-05	4.70365
GOTERM_BP_DIRECT	GO:0048208~COPII vesicle coating	35	0.597882	2.42224e-05	4.61578
GOTERM_BP_DIRECT	GO:0006974~cellular response to DNA damage stimulus	91	1.55449	3.03225e-05	4.51824
GOTERM_BP_DIRECT	GO:0006886~intracellular protein transport	101	1.72532	3.20023e-05	4.49482
GOTERM_BP_DIRECT	GO:0006396~RNA processing	49	0.837035	4.17176e-05	4.37968
GOTERM_BP_DIRECT	GO:0006406~mRNA export from nucleus	50	0.854117	4.82693e-05	4.31633
GOTERM_BP_DIRECT	GO:0007077~mitotic nuclear envelope disassembly	27	0.461223	5.68139e-05	4.24555
GOTERM_BP_DIRECT	GO:0007049~cell cycle	93	1.58866	6.3279e-05	4.19874
GOTERM_BP_DIRECT	GO:0007067~mitotic nuclear division	104	1.77656	6.49529e-05	4.1874
GOTERM_BP_DIRECT	GO:0006357~regulation of transcription from RNA polymerase II promoter	170	2.904	8.98776e-05	4.04635
GOTERM_BP_DIRECT	GO:0006283~transcription-coupled nucleotide-excision repair	39	0.666211	9.37951e-05	4.02782
GOTERM_BP_DIRECT	GO:0006470~protein dephosphorylation	59	1.00786	9.97381e-05	4.00114
GOTERM_BP_DIRECT	GO:0032922~circadian regulation of gene expression	32	0.546635	0.000102515	3.98921
GOTERM_BP_DIRECT	GO:0000086~G2/M transition of mitotic cell cycle	63	1.07619	0.000107768	3.96751
GOTERM_BP_DIRECT	GO:0007062~sister chromatid cohesion	50	0.854117	0.000123909	3.9069
GOTERM_BP_DIRECT	GO:0043488~regulation of mRNA stability	50	0.854117	0.000123909	3.9069
GOTERM_BP_DIRECT	GO:0006409~tRNA export from nucleus	21	0.358729	0.000139022	3.85692
GOTERM_BP_DIRECT	GO:0006511~ubiquitin-dependent protein catabolic process	79	1.3495	0.000144787	3.83927
GOTERM_BP_DIRECT	GO:0006367~transcription initiation from RNA polymerase II promoter	68	1.1616	0.000154064	3.8123
GOTERM_BP_DIRECT	GO:0045893~positive regulation of transcription, DNA-templated	193	3.29689	0.000184749	3.73342
GOTERM_BP_DIRECT	GO:0000226~microtubule cytoskeleton organization	37	0.632046	0.000197651	3.7041
GOTERM_BP_DIRECT	GO:0000082~G1/S transition of mitotic cell cycle	49	0.837035	0.000200451	3.69799
GOTERM_BP_DIRECT	GO:0002223~stimulatory C-type lectin receptor signaling pathway	50	0.854117	0.000222509	3.65265
GOTERM_BP_DIRECT	GO:0042384~cilium assembly	57	0.973693	0.000242117	3.61598
GOTERM_BP_DIRECT	GO:0006261~DNA-dependent DNA replication	14	0.239153	0.000264931	3.57687
GOTERM_BP_DIRECT	GO:0016192~vesicle-mediated transport	67	1.14452	0.00029003	3.53756
GOTERM_BP_DIRECT	GO:0006468~protein phosphorylation	172	2.93816	0.000292029	3.53457
GOTERM_BP_DIRECT	GO:0019827~stem cell population maintenance	28	0.478305	0.000330233	3.48118
GOTERM_BP_DIRECT	GO:1901998~toxin transport	22	0.375811	0.000374969	3.426
GOTERM_BP_DIRECT	GO:0035329~hippo signaling	18	0.307482	0.000390922	3.40791
GOTERM_BP_DIRECT	GO:0006891~intra-Golgi vesicle-mediated transport	18	0.307482	0.000390922	3.40791
GOTERM_BP_DIRECT	GO:0030521~androgen receptor signaling pathway	24	0.409976	0.000436385	3.36013
GOTERM_BP_DIRECT	GO:2000134~negative regulation of G1/S transition of mitotic cell cycle	17	0.2904	0.000445116	3.35153
GOTERM_BP_DIRECT	GO:0006355~regulation of transcription, DNA-templated	509	8.69491	0.000446064	3.3506
GOTERM_BP_DIRECT	GO:0000398~mRNA splicing, via spliceosome	91	1.55449	0.000479128	3.31955
GOTERM_BP_DIRECT	GO:0051436~negative regulation of ubiquitin-protein ligase activity involved in mitotic cell cycle	36	0.614964	0.000480274	3.31851
GOTERM_BP_DIRECT	GO:0000460~maturation of 5.8S rRNA	11	0.187906	0.000644747	3.19061
GOTERM_BP_DIRECT	GO:0070125~mitochondrial translational elongation	41	0.700376	0.000657073	3.18239
GOTERM_BP_DIRECT	GO:0006418~tRNA aminoacylation for protein translation	23	0.392894	0.000833314	3.07919
GOTERM_BP_DIRECT	GO:0030433~ER-associated ubiquitin-dependent protein catabolic process	31	0.529552	0.000882992	3.05404
GOTERM_BP_DIRECT	GO:0010827~regulation of glucose transport	20	0.341647	0.000886602	3.05227
GOTERM_BP_DIRECT	GO:0016569~covalent chromatin modification	51	0.871199	0.000897288	3.04707
GOTERM_BP_DIRECT	GO:0002479~antigen processing and presentation of exogenous peptide antigen via MHC class I, TAP-dependent	32	0.546635	0.00102772	2.98813
GOTERM_BP_DIRECT	GO:0051437~positive regulation of ubiquitin-protein ligase activity involved in regulation of mitotic cell cycle transition	37	0.632046	0.0010306	2.98691
GOTERM_BP_DIRECT	GO:0031145~anaphase-promoting complex-dependent catabolic process	38	0.649129	0.00114816	2.94
GOTERM_BP_DIRECT	GO:0042542~response to hydrogen peroxide	27	0.461223	0.00132695	2.87714
GOTERM_BP_DIRECT	GO:0045454~cell redox homeostasis	37	0.632046	0.00138331	2.85908
GOTERM_BP_DIRECT	GO:0006915~apoptotic process	204	3.4848	0.00139343	2.85591
GOTERM_BP_DIRECT	GO:0048280~vesicle fusion with Golgi apparatus	9	0.153741	0.00157722	2.80211
GOTERM_BP_DIRECT	GO:0071044~histone mRNA catabolic process	11	0.187906	0.00164841	2.78294
GOTERM_BP_DIRECT	GO:1901796~regulation of signal transduction by p53 class mediator	54	0.922446	0.00167623	2.77567
GOTERM_BP_DIRECT	GO:0006260~DNA replication	65	1.11035	0.00171708	2.76521
GOTERM_BP_DIRECT	GO:0006977~DNA damage response, signal transduction by p53 class mediator resulting in cell cycle arrest	31	0.529552	0.00172669	2.76278
GOTERM_BP_DIRECT	GO:0070911~global genome nucleotide-excision repair	19	0.324564	0.0017398	2.7595
GOTERM_BP_DIRECT	GO:0000722~telomere maintenance via recombination	19	0.324564	0.0017398	2.7595
GOTERM_BP_DIRECT	GO:0070126~mitochondrial translational termination	40	0.683293	0.00181889	2.74019
GOTERM_BP_DIRECT	GO:0070936~protein K48-linked ubiquitination	25	0.427058	0.00195208	2.7095
GOTERM_BP_DIRECT	GO:0009411~response to UV	23	0.392894	0.00195319	2.70926
GOTERM_BP_DIRECT	GO:0060071~Wnt signaling pathway, planar cell polarity pathway	42	0.717458	0.00211566	2.67455
GOTERM_BP_DIRECT	GO:0016050~vesicle organization	17	0.2904	0.00250403	2.60136
GOTERM_BP_DIRECT	GO:0090503~RNA phosphodiester bond hydrolysis, exonucleolytic	17	0.2904	0.00250403	2.60136
GOTERM_BP_DIRECT	GO:0006457~protein folding	73	1.24701	0.00251426	2.59959
GOTERM_BP_DIRECT	GO:0006606~protein import into nucleus	29	0.495388	0.00253169	2.59659
GOTERM_BP_DIRECT	GO:0070059~intrinsic apoptotic signaling pathway in response to endoplasmic reticulum stress	19	0.324564	0.00276365	2.55852
GOTERM_BP_DIRECT	GO:0001933~negative regulation of protein phosphorylation	30	0.51247	0.00285723	2.54405
GOTERM_BP_DIRECT	GO:0033683~nucleotide-excision repair, DNA incision	21	0.358729	0.00287537	2.54131
GOTERM_BP_DIRECT	GO:0032436~positive regulation of proteasomal ubiquitin-dependent protein catabolic process	31	0.529552	0.00318736	2.49657
GOTERM_BP_DIRECT	GO:0006521~regulation of cellular amino acid metabolic process	26	0.444141	0.00325772	2.48709
GOTERM_BP_DIRECT	GO:0006397~mRNA processing	72	1.22993	0.00343548	2.46401
GOTERM_BP_DIRECT	GO:0006368~transcription elongation from RNA polymerase II promoter	39	0.666211	0.00361338	2.44209
GOTERM_BP_DIRECT	GO:0072383~plus-end-directed vesicle transport along microtubule	7	0.119576	0.00376872	2.42381
GOTERM_BP_DIRECT	GO:0034453~microtubule anchoring	10	0.170823	0.00399607	2.39837
GOTERM_BP_DIRECT	GO:0006099~tricarboxylic acid cycle	17	0.2904	0.0040443	2.39316
GOTERM_BP_DIRECT	GO:0006294~nucleotide-excision repair, preincision complex assembly	17	0.2904	0.0040443	2.39316
GOTERM_BP_DIRECT	GO:0009791~post-embryonic development	34	0.580799	0.00418434	2.37837
GOTERM_BP_DIRECT	GO:0051292~nuclear pore complex assembly	9	0.153741	0.00425796	2.3708
GOTERM_BP_DIRECT	GO:0047497~mitochondrion transport along microtubule	8	0.136659	0.00426202	2.37038
GOTERM_BP_DIRECT	GO:0006509~membrane protein ectodomain proteolysis	14	0.239153	0.00427468	2.3691
GOTERM_BP_DIRECT	GO:0007264~small GTPase mediated signal transduction	94	1.60574	0.00489713	2.31006
GOTERM_BP_DIRECT	GO:0006296~nucleotide-excision repair, DNA incision, 5'-to lesion	20	0.341647	0.00518318	2.2854
GOTERM_BP_DIRECT	GO:0038061~NIK/NF-kappaB signaling	31	0.529552	0.00558324	2.25311
GOTERM_BP_DIRECT	GO:0006897~endocytosis	57	0.973693	0.00595119	2.2254
GOTERM_BP_DIRECT	GO:0007020~microtubule nucleation	12	0.204988	0.0060114	2.22102
GOTERM_BP_DIRECT	GO:0042147~retrograde transport, endosome to Golgi	32	0.546635	0.00603979	2.21898
GOTERM_BP_DIRECT	GO:0007346~regulation of mitotic cell cycle	21	0.358729	0.00614478	2.21149
GOTERM_BP_DIRECT	GO:0002474~antigen processing and presentation of peptide antigen via MHC class I	17	0.2904	0.00627977	2.20206
GOTERM_BP_DIRECT	GO:0008285~negative regulation of cell proliferation	143	2.44277	0.00629322	2.20113
GOTERM_BP_DIRECT	GO:0030148~sphingolipid biosynthetic process	24	0.409976	0.00664741	2.17735
GOTERM_BP_DIRECT	GO:0006369~termination of RNA polymerase II transcription	30	0.51247	0.00672211	2.17249
GOTERM_BP_DIRECT	GO:0007173~epidermal growth factor receptor signaling pathway	27	0.461223	0.00680274	2.16732
GOTERM_BP_DIRECT	GO:0016311~dephosphorylation	38	0.649129	0.00687458	2.16275
GOTERM_BP_DIRECT	GO:0034976~response to endoplasmic reticulum stress	34	0.580799	0.00692706	2.15945
GOTERM_BP_DIRECT	GO:0010629~negative regulation of gene expression	56	0.956611	0.00692896	2.15933
GOTERM_BP_DIRECT	GO:0016310~phosphorylation	43	0.73454	0.00692901	2.15933
GOTERM_BP_DIRECT	GO:0044804~nucleophagy	11	0.187906	0.00706512	2.15088
GOTERM_BP_DIRECT	GO:0006479~protein methylation	14	0.239153	0.00715649	2.1453
GOTERM_BP_DIRECT	GO:0000122~negative regulation of transcription from RNA polymerase II promoter	247	4.21934	0.00739996	2.13077
GOTERM_BP_DIRECT	GO:0045931~positive regulation of mitotic cell cycle	16	0.273317	0.00764871	2.11641
GOTERM_BP_DIRECT	GO:0015992~proton transport	24	0.409976	0.00902836	2.04439
GOTERM_BP_DIRECT	GO:0032781~positive regulation of ATPase activity	17	0.2904	0.00941226	2.02631
GOTERM_BP_DIRECT	GO:0006379~mRNA cleavage	9	0.153741	0.00942205	2.02585
GOTERM_BP_DIRECT	GO:0007249~I-kappaB kinase/NF-kappaB signaling	28	0.478305	0.00974684	2.01114
GOTERM_BP_DIRECT	GO:0032088~negative regulation of NF-kappaB transcription factor activity	32	0.546635	0.00991025	2.00392
GOTERM_BP_DIRECT	GO:0006417~regulation of translation	25	0.427058	0.00995857	2.0018

## Sheet: GO_GSE40595
Category	Term	Count	%	PValue	-log pvalue
GOTERM_BP_DIRECT	GO:0030198~extracellular matrix organization	100	1.52486	1.16596e-07	6.93332
GOTERM_BP_DIRECT	GO:0006886~intracellular protein transport	114	1.73833	5.58879e-07	6.25268
GOTERM_BP_DIRECT	GO:0016055~Wnt signaling pathway	90	1.37237	1.14982e-05	4.93937
GOTERM_BP_DIRECT	GO:0032956~regulation of actin cytoskeleton organization	30	0.457457	3.66898e-05	4.43546
GOTERM_BP_DIRECT	GO:0030336~negative regulation of cell migration	51	0.777676	3.77924e-05	4.4226
GOTERM_BP_DIRECT	GO:0015031~protein transport	166	2.53126	5.82034e-05	4.23505
GOTERM_BP_DIRECT	GO:0090090~negative regulation of canonical Wnt signaling pathway	78	1.18939	5.9543e-05	4.22517
GOTERM_BP_DIRECT	GO:0045893~positive regulation of transcription, DNA-templated	207	3.15645	0.000167674	3.77554
GOTERM_BP_DIRECT	GO:0050821~protein stabilization	65	0.991156	0.000274289	3.56179
GOTERM_BP_DIRECT	GO:0035329~hippo signaling	19	0.289722	0.000282897	3.54837
GOTERM_BP_DIRECT	GO:0030206~chondroitin sulfate biosynthetic process	18	0.274474	0.000292723	3.53354
GOTERM_BP_DIRECT	GO:0030199~collagen fibril organization	24	0.365965	0.00059302	3.22693
GOTERM_BP_DIRECT	GO:0051895~negative regulation of focal adhesion assembly	13	0.198231	0.000608112	3.21602
GOTERM_BP_DIRECT	GO:0001701~in utero embryonic development	83	1.26563	0.000724443	3.14
GOTERM_BP_DIRECT	GO:0007179~transforming growth factor beta receptor signaling pathway	46	0.701433	0.000764747	3.11648
GOTERM_BP_DIRECT	GO:0098609~cell-cell adhesion	114	1.73833	0.000855961	3.06755
GOTERM_BP_DIRECT	GO:0006888~ER to Golgi vesicle-mediated transport	72	1.0979	0.00107329	2.96928
GOTERM_BP_DIRECT	GO:0034497~protein localization to pre-autophagosomal structure	10	0.152486	0.00111265	2.95364
GOTERM_BP_DIRECT	GO:0030512~negative regulation of transforming growth factor beta receptor signaling pathway	34	0.518451	0.00120266	2.91986
GOTERM_BP_DIRECT	GO:0070301~cellular response to hydrogen peroxide	31	0.472705	0.00129217	2.88868
GOTERM_BP_DIRECT	GO:0007049~cell cycle	93	1.41812	0.0013407	2.87267
GOTERM_BP_DIRECT	GO:0001666~response to hypoxia	76	1.15889	0.00143673	2.84263
GOTERM_BP_DIRECT	GO:0000045~autophagosome assembly	24	0.365965	0.00153255	2.81458
GOTERM_BP_DIRECT	GO:0001843~neural tube closure	39	0.594694	0.00154507	2.81105
GOTERM_BP_DIRECT	GO:0006468~protein phosphorylation	179	2.72949	0.00169362	2.77118
GOTERM_BP_DIRECT	GO:0010628~positive regulation of gene expression	109	1.66209	0.0017453	2.75813
GOTERM_BP_DIRECT	GO:0006829~zinc II ion transport	8	0.121988	0.00218925	2.6597
GOTERM_BP_DIRECT	GO:0043065~positive regulation of apoptotic process	122	1.86032	0.00242615	2.61508
GOTERM_BP_DIRECT	GO:0048041~focal adhesion assembly	16	0.243977	0.00242661	2.615
GOTERM_BP_DIRECT	GO:0030208~dermatan sulfate biosynthetic process	10	0.152486	0.00316114	2.50016
GOTERM_BP_DIRECT	GO:0043547~positive regulation of GTPase activity	215	3.27844	0.00347519	2.45902
GOTERM_BP_DIRECT	GO:0034613~cellular protein localization	24	0.365965	0.00352072	2.45337
GOTERM_BP_DIRECT	GO:0070979~protein K11-linked ubiquitination	17	0.259225	0.00377591	2.42298
GOTERM_BP_DIRECT	GO:0051899~membrane depolarization	16	0.243977	0.00425464	2.37114
GOTERM_BP_DIRECT	GO:0008219~cell death	22	0.335468	0.00469568	2.3283
GOTERM_BP_DIRECT	GO:0060021~palate development	37	0.564196	0.0048427	2.31491
GOTERM_BP_DIRECT	GO:0050680~negative regulation of epithelial cell proliferation	29	0.442208	0.00484947	2.31431
GOTERM_BP_DIRECT	GO:0006614~SRP-dependent cotranslational protein targeting to membrane	44	0.670936	0.00493949	2.30632
GOTERM_BP_DIRECT	GO:0016241~regulation of macroautophagy	24	0.365965	0.00513369	2.28957
GOTERM_BP_DIRECT	GO:0071560~cellular response to transforming growth factor beta stimulus	26	0.396462	0.00543451	2.26484
GOTERM_BP_DIRECT	GO:0030334~regulation of cell migration	36	0.548948	0.00558755	2.25278
GOTERM_BP_DIRECT	GO:0007155~cell adhesion	176	2.68375	0.00570605	2.24366
GOTERM_BP_DIRECT	GO:0030308~negative regulation of cell growth	54	0.823422	0.00593682	2.22645
GOTERM_BP_DIRECT	GO:0030182~neuron differentiation	44	0.670936	0.0062291	2.20557
GOTERM_BP_DIRECT	GO:0045944~positive regulation of transcription from RNA polymerase II promoter	356	5.42848	0.00641208	2.193
GOTERM_BP_DIRECT	GO:0006974~cellular response to DNA damage stimulus	86	1.31138	0.00660064	2.18041
GOTERM_BP_DIRECT	GO:0042060~wound healing	38	0.579445	0.00702425	2.1534
GOTERM_BP_DIRECT	GO:0007266~Rho protein signal transduction	26	0.396462	0.00755948	2.12151
GOTERM_BP_DIRECT	GO:0060548~negative regulation of cell death	28	0.426959	0.00766895	2.11526
GOTERM_BP_DIRECT	GO:0016192~vesicle-mediated transport	65	0.991156	0.0079572	2.09924
GOTERM_BP_DIRECT	GO:0001568~blood vessel development	21	0.32022	0.00799557	2.09715
GOTERM_BP_DIRECT	GO:0018107~peptidyl-threonine phosphorylation	21	0.32022	0.00799557	2.09715
GOTERM_BP_DIRECT	GO:0048870~cell motility	15	0.228728	0.00805711	2.09382
GOTERM_BP_DIRECT	GO:0045444~fat cell differentiation	35	0.533699	0.00835936	2.07783
GOTERM_BP_DIRECT	GO:0007264~small GTPase mediated signal transduction	99	1.50961	0.00880995	2.05503
GOTERM_BP_DIRECT	GO:0006661~phosphatidylinositol biosynthetic process	29	0.442208	0.00888396	2.05139
GOTERM_BP_DIRECT	GO:0043085~positive regulation of catalytic activity	38	0.579445	0.008947	2.04832
GOTERM_BP_DIRECT	GO:0045892~negative regulation of transcription, DNA-templated	188	2.86673	0.00973011	2.01188

## Sheet: Expressioin Data
	Expression level			log			Zscore
Target Name	OVCAR8 EV	SKOV3 EV	ES-2 EV	OVCAR8 EV	SKOV3 EV	ES-2 EV	OVCAR8	SKOV3	ES-22
ACTG1	0.993781	3.73472	5.12659	-0.00270927	0.572258	0.709829	1.33706	1.77297	1.87727
AJUBA	0.0398576	0.13603	0.225313	-1.39949	-0.866364	-0.647214	0.278102	0.682287	0.848435
AMOT	0.00494436	0.00158863	2.44794e-06	-2.30589	-2.79898	-5.6112	-0.409082	-0.782914	-2.91499
AMOTL1	0.061002	0.0651993	0.164254	-1.21466	-1.18576	-0.784484	0.418232	0.440141	0.744364
AMOTL2	0.0319288	0.0123444	0.0766272	-1.49582	-1.90853	-1.11562	0.20507	-0.107826	0.493317
B2M	3.51754e-06	2.54206	2.08204	-5.45376	0.405186	0.31849	-2.79563	1.64631	1.58058
CASP3	0.0017627	0.0597466	0.0609597	-2.75382	-1.22369	-1.21496	-0.74868	0.411385	0.418003
CCNE1	0.0323072	0.0212705	0.0280666	-1.4907	-1.67222	-1.55181	0.20895	0.0713303	0.16262
CCNE2	0.00472982	0.00826941	0.0126213	-2.32516	-2.08253	-1.8989	-0.423689	-0.23974	-0.100523
CRB1	1.51324e-05	6.84305e-05	0.000368002	-4.82009	-4.16475	-3.43415	-2.31521	-1.81837	-1.26447
CRB2	0.000740609	0.000186699	6.55942e-06	-3.13041	-3.72886	-5.18313	-1.03419	-1.4879	-2.59045
CRB3	0.00101803	0.0134244	5.84677e-05	-2.99224	-1.87211	-4.23308	-0.929434	-0.0802108	-1.87018
CSNK1D	0.156909	0.469436	0.667574	-0.804352	-0.328424	-0.1755	0.729302	1.09012	1.20606
CSNK1E	0.149685	0.330793	0.984866	-0.824822	-0.480444	-0.00662266	0.713782	0.974871	1.3341
DCHS1	0.00486616	0.0131755	0.00579089	-2.31281	-1.88023	-2.23725	-0.414332	-0.0863728	-0.357047
DCHS2	0.00022187	0.000123432	0.000318151	-3.6539	-3.90857	-3.49737	-1.43107	-1.62415	-1.3124
DIAPH2	0.0251552	0.0916958	0.112969	-1.59937	-1.03765	-0.94704	0.126561	0.552428	0.621123
DLG1	0.0255772	0.200267	0.141023	-1.59215	-0.69839	-0.850711	0.132038	0.809637	0.694155
DVL2	0.0419554	0.0402184	0.161209	-1.37721	-1.39558	-0.792612	0.29499	0.281069	0.738202
FAT1	0.0391458	0.518351	0.103665	-1.40732	-0.285376	-0.984368	0.272168	1.12276	0.592823
FAT2	3.50069e-05	0.00106495	2.04718e-05	-4.45585	-2.97267	-4.68884	-2.03906	-0.9146	-2.21571
FAT3	1.91407e-05	0.00254345	0.000231612	-4.71804	-2.59458	-3.63524	-2.23785	-0.62795	-1.41692
FAT4	0.00112645	0.00169559	0.0212263	-2.94829	-2.77068	-1.67312	-0.896113	-0.761461	0.0706456
FJX1	0.00445302	0.000432204	0.0159091	-2.35135	-3.36431	-1.79835	-0.443544	-1.21152	-0.0242958
GPC5	0.000589182	0.000402702	0.00435836	-3.22975	-3.39502	-2.36068	-1.1095	-1.2348	-0.450619
HIPK2	0.115263	0.160539	0.64797	-0.93831	-0.794418	-0.188445	0.627742	0.736833	1.19625
HMBS	0.00918185	0.0224833	0.0467788	-2.03707	-1.64814	-1.32995	-0.205278	0.0895883	0.330822
HMCN1	0.000227791	0.0182621	0.00367256	-3.64246	-1.73845	-2.43503	-1.4224	0.0211209	-0.506991
IPO8	0.0234706	0.289774	0.245876	-1.62948	-0.537941	-0.609285	0.103738	0.93128	0.877191
LAST1	0.00471672	0.0699273	0.0654256	-2.32636	-1.15535	-1.18425	-0.424602	0.463192	0.441282
LAST2	0.0100755	0.017313	0.0253126	-1.99673	-1.76163	-1.59666	-0.174696	0.00354762	0.128615
LIMD1	0.00658774	0.0171815	0.0309268	-2.18126	-1.76494	-1.50967	-0.314597	0.00103715	0.194572
LIX1L	0.00706546	0.0404421	0.101884	-2.15086	-1.39317	-0.991894	-0.291547	0.282894	0.587118
LLGL1	0.00931002	0.0121913	0.0264241	-2.03105	-1.91395	-1.578	-0.200713	-0.111934	0.142765
LLGL2	0.0212411	0.0224833	0.000460663	-1.67282	-1.64814	-3.33662	0.0708739	0.0895883	-1.19052
LPP	0.00915642	0.0686784	0.223291	-2.03827	-1.16318	-0.651128	-0.206191	0.457258	0.845468
MAPK10	0.0067355	0.0204041	0.000713895	-2.17163	-1.69028	-3.14637	-0.307294	0.0576368	-1.04629
MEIS1	0.000639841	0.023914	0.00714426	-3.19393	-1.62135	-2.14604	-1.08234	0.1099	-0.287895
MOB1A	0.0382605	0.344363	0.412367	-1.41725	-0.462984	-0.384716	0.264636	0.988108	1.04745
MOB1B	0.0154741	0.0508362	0.0497555	-1.81039	-1.29383	-1.30316	-0.0334248	0.358209	0.351134
MPDZ	0.0183383	0.074687	0.255607	-1.73664	-1.12676	-0.592427	0.0224903	0.484873	0.889972
MPP5	0.153042	0.141807	0.136597	-0.815189	-0.848303	-0.864558	0.721086	0.695981	0.683657
MST1	0.00192357	0.00363457	0.00373416	-2.71589	-2.43955	-2.42781	-0.719924	-0.510414	-0.501513
MYC	0.0861503	0.0683934	0.622006	-1.06474	-1.16499	-0.206206	0.531887	0.455889	1.18278
NF2	2.21859e-05	0.120993	0.393381	-4.65392	-0.917238	-0.405186	-2.18923	0.643717	1.03193
NPHP4	0.00401051	0.00972558	0.0109191	-2.3968	-2.01208	-1.96181	-0.478006	-0.186335	-0.148222
PARD3	0.0311851	0.135842	0.25349	-1.50605	-0.866966	-0.596039	0.19731	0.681831	0.887233
PARD6G	0.000812131	0.000795418	5.15739e-05	-3.09037	-3.0994	-4.28757	-1.00384	-1.01068	-1.91148
POTEF	0.0107613	0.0251378	2.3144e-05	-1.96813	-1.59967	-4.63556	-0.153014	0.126332	-2.17531
PPP2CB	0.0393362	0.194252	0.0615968	-1.40521	-0.711635	-1.21044	0.273765	0.799595	0.421427
PPP2R1	0.104458	0.136882	0.129408	-0.981057	-0.863655	-0.888038	0.595334	0.684341	0.665855
PPP2R2	0.0085848	0.0468437	0.111028	-2.06627	-1.32935	-0.954566	-0.227416	0.331278	0.615418
PRKC1	0.0103015	0.0532528	0.105477	-1.9871	-1.27366	-0.976842	-0.167393	0.3735	0.598529
PRKCZ	0.0241975	0.0696854	0.000145066	-1.61623	-1.15686	-3.83843	0.11378	0.462051	-1.57097
PTPN14	0.0186071	0.194387	0.352086	-1.73032	-0.711334	-0.453351	0.027283	0.799823	0.995411
RASSF2	0.00600758	0.00180098	3.27079e-05	-2.2213	-2.74449	-4.48535	-0.344951	-0.741605	-2.06143
RASSF4	0.00836163	0.00598265	0.0311851	-2.07771	-2.22311	-1.50605	-0.236088	-0.346321	0.19731
RERE	0.0166885	0.0727958	0.132219	-1.77758	-1.13789	-0.878707	-0.00854828	0.476429	0.67293
RPLP0	0.24115	1.68296	11.0732	-0.617714	0.226074	1.04427	0.870801	1.51051	2.13083
SAV1	0.0311419	0.0913153	0.0851411	-1.50666	-1.03946	-1.06986	0.196854	0.551058	0.528008
SCRIB	0.00909948	0.013735	0.0244673	-2.04098	-1.86217	-1.61141	-0.208245	-0.0726794	0.117432
SMAD1	0.0300602	0.0517248	0.0180607	-1.52201	-1.2863	-1.74326	0.185214	0.363914	0.0174693
STK3	0.0267373	0.048094	0.0915688	-1.57288	-1.31791	-1.03825	0.146644	0.339951	0.551971
STK4	0.038234	0.0640348	0.155609	-1.41755	-1.19358	-0.807965	0.264408	0.434207	0.726563
TAOK1	0.0230035	0.251042	0.178377	-1.63821	-0.600254	-0.748662	0.0971197	0.884038	0.771523
TAOK2	0.0174093	0.0765741	0.068204	-1.75922	-1.11592	-1.16619	0.00537342	0.493089	0.454976
TAOK3	0.0035132	0.0193302	0.0693	-2.4543	-1.71376	-1.15927	-0.521597	0.0398353	0.460225
TAZ	0.0129222	0.0162885	0.0278728	-1.88866	-1.78812	-1.55482	-0.0927631	-0.0165361	0.160338
TBP	0.00311188	0.0671718	0.0818428	-2.50698	-1.17281	-1.08702	-0.561536	0.449955	0.514999
TEAD1	0.119908	0.298127	0.321302	-0.921152	-0.525598	-0.493087	0.640751	0.940638	0.965286
TEAD2	0.0148129	0.059788	0.011195	-1.82936	-1.22339	-1.95098	-0.0478029	0.411613	-0.140006
TEAD3	0.0041347	0.0214928	0.0142292	-2.38356	-1.66771	-1.84682	-0.467964	0.0747537	-0.0610399
TEAD4	0.0189849	0.027337	0.0396098	-1.72159	-1.56325	-1.4022	0.0339015	0.153948	0.276048
TFRC	0.100203	0.192109	0.245535	-0.999119	-0.716451	-0.609887	0.58164	0.795943	0.876735
TJP1	0.0151977	0.186081	0.144486	-1.81822	-0.730299	-0.840175	-0.0393586	0.785445	0.702143
TJP2	0.0167465	0.0105618	0.0184786	-1.77608	-1.97626	-1.73333	-0.00740715	-0.159176	0.0250007
TP63	3.62899e-06	0.00116456	0.12345	-5.44021	-2.93384	-0.908509	-2.78536	-0.885159	0.650336
TSHZ1	0.00337008	0.0320618	0.022924	-2.47236	-1.49401	-1.63971	-0.535291	0.206439	0.0959786
TSHZ2	6.30906e-08	3.55448e-05	1.45052e-06	-7.20004	-4.44922	-5.83848	-4.11956	-2.03404	-3.0873
TSHZ3	0.000834385	0.00109261	0.020546	-3.07863	-2.96153	-1.68727	-0.994935	-0.906155	0.0599191
WNT1	5.87899e-06	2.48027e-07	2.21387e-06	-5.2307	-6.6055	-5.65485	-2.62651	-3.66881	-2.94808
WTIP	0.00371866	0.00864451	9.11751e-05	-2.42961	-2.06326	-4.04012	-0.502883	-0.225133	-1.72388
WWC1	0.0312067	0.066893	0.175312	-1.50575	-1.17462	-0.756187	0.197538	0.448585	0.765818
WWTR1	0.0101105	0.077643	0.0376554	-1.99523	-1.1099	-1.42417	-0.173555	0.497654	0.259387
YAP1	0.0743254	0.181747	0.690159	-1.12886	-0.740534	-0.161051	0.483276	0.777685	1.21702
YWHAB	0.184539	0.84792	0.575146	-0.733911	-0.0716451	-0.240222	0.782706	1.2848	1.15699
YWHAE	0.0338195	0.0302693	0.0474647	-1.47083	-1.519	-1.32363	0.224013	0.187497	0.335614
YWHAQ	0.0916323	0.532554	0.771105	-1.03795	-0.273636	-0.112886	0.552199	1.13166	1.25353
YWHAZ	82.2532	2.58112	2.67215	1.91515	0.411809	0.426861	2.79108	1.65133	1.66274
ZDHHC1	0.0570353	0.104821	0.0891884	-1.24386	-0.979552	-1.04969	0.396094	0.596475	0.543299

## Sheet: Heatmap ES-2 Fig2
	Expression level			Log10			z-score
Target Name	ES-2 EV	ES-2 miR-30b	ES-2 shMYPT1	ES-2 EV	ES-2 miR-30b	ES-2 shMYPT1	ES-2 EV	ES-2 miR-30b	ES-2 shMYPT1
ACTG1	3.85572	0.993781	0.609628	0.586105	-0.00270927	-0.214935	1.98403	1.54566	1.38766
YWHAZ	1.5966	82.2532	0.568015	0.203195	1.91515	-0.24564	1.69896	2.97348	1.36481
CSNK1D	1.21757	0.156909	0.0317522	0.0854925	-0.804352	-1.49823	1.61133	0.948853	0.432274
CSNK1E	1.01115	0.149685	0.0428073	0.00481648	-0.824822	-1.36848	1.55127	0.933613	0.528866
HIPK2	0.920826	0.115263	0.0283796	-0.0358226	-0.93831	-1.54699	1.52101	0.849123	0.395968
MPP5	0.865737	0.153042	0.0383136	-0.0626142	-0.815189	-1.41665	1.50107	0.940785	0.493008
AMOTL1	0.750019	0.061002	0.0133409	-0.124927	-1.21466	-1.87481	1.45467	0.643388	0.15191
RPLP0	0.657927	0.24115	0.395843	-0.181822	-0.617714	-0.402477	1.41232	1.0878	1.24804
MYC	0.656561	0.0861503	0.0217627	-0.182725	-1.06474	-1.66229	1.41164	0.754996	0.310133
YWHAB	0.635516	0.184539	0.135654	-0.196874	-0.733911	-0.867568	1.40111	1.00129	0.901789
TEAD1	0.567228	0.119908	0.04979	-0.246243	-0.921152	-1.30286	1.36436	0.861897	0.577723
YAP1	0.551717	0.0743254	0.0319952	-0.258284	-1.12886	-1.49491	1.35539	0.70726	0.434739
ZDHHC1	0.425137	0.0570353	0.0180858	-0.371471	-1.24386	-1.74266	1.27113	0.621649	0.250295
STK3	0.336575	0.0267373	0.00799326	-0.472918	-1.57288	-2.09728	1.1956	0.376694	-0.0137095
YWHAQ	0.333787	0.0916323	0.102806	-0.47653	-1.03795	-0.98798	1.19291	0.774942	0.812144
PPP2R1	0.330564	0.104458	0.0258803	-0.480745	-0.981057	-1.58703	1.18977	0.817299	0.366161
CCNE1	0.291587	0.0323072	0.0156034	-0.535231	-1.4907	-1.80678	1.14921	0.437877	0.202559
FAT1	0.264071	0.0391458	0.0117028	-0.578279	-1.40732	-1.93171	1.11716	0.499956	0.109552
LLGL2	0.259175	0.0212411	0.00428348	-0.586406	-1.67282	-2.3682	1.11111	0.302289	-0.21541
STK4	0.234393	0.038234	0.010687	-0.630056	-1.41755	-1.97114	1.07861	0.492336	0.0801936
WWC1	0.211686	0.0312067	0.0135929	-0.674307	-1.50575	-1.86669	1.04567	0.426671	0.157961
PRKCZ	0.193178	0.0241975	0.00563253	-0.714043	-1.61623	-2.2493	1.01609	0.344422	-0.126886
DVL2	0.175677	0.0419554	0.00915642	-0.755284	-1.37721	-2.03827	0.985383	0.522367	0.0302165
SMAD1	0.169811	0.0300602	0.004044	-0.770035	-1.52201	-2.39319	0.974402	0.414569	-0.234012
MOB1A	0.169576	0.0382605	0.0302064	-0.770637	-1.41725	-1.5199	0.973953	0.49256	0.416138
PPP2CB	0.155501	0.0393362	0.0258624	-0.808266	-1.40521	-1.58733	0.945939	0.501525	0.365937
TAOK1	0.151774	0.0230035	0.0112885	-0.818802	-1.63821	-1.94736	0.938095	0.328062	0.0978984
PARD3	0.14742	0.0311851	0.00972558	-0.831445	-1.50605	-2.01208	0.928683	0.426447	0.0497143
AJUBA	0.132954	0.0398576	0.0181612	-0.876298	-1.39949	-1.74086	0.89529	0.505783	0.251639
DIAPH2	0.12807	0.0251552	0.00729437	-0.892554	-1.59937	-2.13701	0.883188	0.356972	-0.0432923
PTPN14	0.126131	0.0186071	0.00438563	-0.899177	-1.73032	-2.35797	0.878257	0.259483	-0.207791
POTEF	0.12526	0.0107613	0.00145174	-0.902187	-1.96813	-2.83811	0.876016	0.0824347	-0.56525
TAZ	0.122597	0.0129222	0.00368786	-0.911519	-1.88866	-2.43323	0.869069	0.1416	-0.263819
IPO8	0.117848	0.0234706	0.00815556	-0.928678	-1.62948	-2.08855	0.856294	0.334561	-0.0072102
SAV1	0.110338	0.0311419	0.0158981	-0.957275	-1.50666	-1.79865	0.835004	0.425999	0.20861
TJP2	0.110109	0.0167465	0.00521542	-0.958178	-1.77608	-2.28271	0.834331	0.225418	-0.151763
DLG1	0.105697	0.0255772	0.0086565	-0.975939	-1.59215	-2.06266	0.821109	0.362351	0.0120635
AMOTL2	0.104531	0.0319288	0.00715417	-0.980756	-1.49582	-2.14544	0.817523	0.434067	-0.0495674
YWHAE	0.103521	0.0338195	0.00994371	-0.98497	-1.47083	-2.00245	0.814385	0.452668	0.0568859
RERE	0.101391	0.0166885	0.00339117	-0.994001	-1.77758	-2.46965	0.807662	0.224298	-0.290936
TFRC	0.100203	0.100203	0.0177874	-0.999119	-0.999119	-1.74989	0.803852	0.803852	0.244916
LAST2	0.0946666	0.0100755	0.0019356	-1.0238	-1.99673	-2.71318	0.785475	0.061144	-0.472243
MPDZ	0.0938174	0.0183383	0.00853141	-1.02772	-1.73664	-2.06898	0.782561	0.254777	0.00735709
HMBS	0.0882047	0.00918185	0.0036751	-1.05451	-2.03707	-2.43473	0.762615	0.031113	-0.264939
TEAD4	0.0826982	0.0189849	0.0158541	-1.0825	-1.72159	-1.79986	0.741773	0.265983	0.207713
RASSF4	0.0787815	0.00836163	0.00138586	-1.10358	-2.07771	-2.85828	0.726085	0.000857838	-0.580265
TAOK2	0.0734548	0.0174093	0.00908058	-1.13398	-1.75922	-2.04189	0.70345	0.237969	0.0275272
TEAD2	0.0675453	0.0148129	0.008496	-1.1704	-1.82936	-2.07079	0.676332	0.18575	0.00601242
MOB1B	0.0632847	0.0154741	0.011454	-1.1987	-1.81039	-1.94104	0.655266	0.19987	0.102605
SCRIB	0.0539213	0.00909948	0.00444377	-1.26824	-2.04098	-2.35225	0.603496	0.0281995	-0.203533
PRKC1	0.0503453	0.0103015	0.00696336	-1.29804	-1.9871	-2.15718	0.581309	0.0683156	-0.0583078
WWTR1	0.0433147	0.0101105	0.00232428	-1.36336	-1.99523	-2.63371	0.532676	0.0622646	-0.413078
LPP	0.0420719	0.00915642	0.00412326	-1.37601	-2.03827	-2.38476	0.523264	0.0302165	-0.227737
TSHZ1	0.0405543	0.00337008	0.000621051	-1.39196	-2.47236	-3.20687	0.511386	-0.292953	-0.839787
LIMD1	0.0400793	0.00658774	0.00319272	-1.39708	-2.18126	-2.49584	0.507576	-0.0762368	-0.310434
LIX1L	0.0389023	0.00706546	0.00444994	-1.41002	-2.15086	-2.35165	0.497939	-0.0536014	-0.203084
PPP2R2	0.033377	0.0085848	0.00499258	-1.47655	-2.06627	-2.30168	0.44841	0.0093741	-0.165882
TJP1	0.0333539	0.0151977	0.0191967	-1.47685	-1.81822	-1.71677	0.448186	0.194043	0.269568
DCHS1	0.0317082	0.00486616	0.00119481	-1.49883	-2.31281	-2.9227	0.431826	-0.174174	-0.628225
LLGL1	0.0313802	0.00931002	0.00240791	-1.50334	-2.03105	-2.61836	0.428464	0.0355952	-0.401648
TAOK3	0.0303744	0.0035132	0.00203607	-1.51749	-2.4543	-2.69121	0.417931	-0.279507	-0.455883
TEAD3	0.0229399	0.0041347	0.00315532	-1.63941	-2.38356	-2.50096	0.327165	-0.22684	-0.314244
AMOT	0.020207	0.00494436	0.000991568	-1.6945	-2.30589	-3.00368	0.286153	-0.169019	-0.688511
RASSF2	0.01925	0.00600758	0.00132849	-1.71557	-2.2213	-2.87664	0.270465	-0.106044	-0.593936
MST1	0.0184147	0.00192357	0.000467094	-1.73484	-2.71589	-3.3306	0.256122	-0.47426	-0.931897
NPHP4	0.018199	0.00401051	0.000845446	-1.73995	-2.3968	-3.07291	0.252312	-0.236701	-0.740057
LAST1	0.0167117	0.00471672	0.00414618	-1.77698	-2.32636	-2.38235	0.224746	-0.184259	-0.225944
TBP	0.0156034	0.00311188	0.00443761	-1.80678	-2.50698	-2.35285	0.202559	-0.318726	-0.203981
FJX1	0.0126914	0.00445302	0.00166761	-1.89649	-2.35135	-2.7779	0.135773	-0.20286	-0.520427
CCNE2	0.010957	0.00472982	0.00583117	-1.96031	-2.32516	-2.23424	0.0882616	-0.183362	-0.115681
CASP3	0.0108964	0.0017627	0.00296038	-1.96272	-2.75382	-2.52865	0.0864687	-0.502498	-0.334862
WTIP	0.00967851	0.00371866	0.0010124	-2.01419	-2.42961	-2.99465	0.0481455	-0.261129	-0.681788
TSHZ3	0.00817821	0.000834385	0.000895512	-2.08734	-3.07863	-3.04793	-0.00631375	-0.744315	-0.721456
MAPK10	0.0067355	0.0067355	0.000151857	-2.17163	-2.17163	-3.81857	-0.0690652	-0.0690652	-1.29518
GPC5	0.00624969	0.000589182	0.000206725	-2.20414	-3.22975	-3.68461	-0.0932693	-0.85682	-1.19545
CRB2	0.00443147	0.000740609	1.16122e-05	-2.35345	-3.13041	-4.93509	-0.204429	-0.782863	-2.12642
FAT4	0.00338647	0.00112645	0.00115092	-2.47025	-2.94829	-2.93896	-0.291385	-0.647275	-0.640327
PARD6G	0.00323953	0.000812131	5.4063e-05	-2.48952	-3.09037	-4.2671	-0.305728	-0.753056	-1.62911
CRB3	0.00202902	0.00101803	0.000137431	-2.69271	-2.99224	-3.86191	-0.457004	-0.679995	-1.32746
MEIS1	0.00188529	0.000639841	0.000377823	-2.72462	-3.19393	-3.42271	-0.480759	-0.83015	-1.00048
DCHS2	0.00175782	0.00022187	0.000289731	-2.75503	-3.6539	-3.53801	-0.503395	-1.17259	-1.08631
HMCN1	0.00164922	0.000227791	6.66516e-05	-2.78272	-3.64246	-4.17619	-0.524013	-1.16408	-1.56143
CRB1	0.000524053	1.51324e-05	4.07717e-06	-3.28062	-4.82009	-5.38964	-0.894695	-2.0408	-2.46483
WNT1	0.000211948	5.87899e-06	2.37441e-06	-3.67377	-5.2307	-5.62444	-1.18739	-2.34649	-2.63963
TP63	9.37384e-05	3.62899e-06	2.24633e-06	-4.02808	-5.44021	-5.64853	-1.45117	-2.50248	-2.65756
FAT2	8.89898e-05	3.50069e-05	6.82816e-07	-4.05066	-4.45585	-6.1657	-1.46797	-1.76963	-3.04259
FAT3	3.72345e-05	1.91407e-05	2.0245e-06	-4.42905	-4.71804	-5.69368	-1.74968	-1.96483	-2.69118
NF2	3.4525e-05	2.21859e-05	9.32801e-06	-4.46187	-4.65392	-5.03021	-1.77411	-1.91709	-2.19724
B2M	1.50487e-05	3.51754e-06	1.43154e-06	-4.8225	-5.45376	-5.8442	-2.0426	-2.51256	-2.80323
TSHZ2	6.30906e-08	6.30906e-08	6.30906e-08	-7.20004	-7.20004	-7.20004	-3.81264	-3.81264	-3.81264

## Sheet: Heatmap OVCAR8 Fig2
	Expression level			Log10			Z-Score
Target Name	OVCAR8 EV	OVCAR8 miR-30b	OVCAR8 shMYPT1	OVCAR8 EV	OVCAR8 miR-30b	OVCAR8 shMYPT1	OVCAR8 EV	OVCAR8 miR-30b	OVCAR8 shMYPT1
ACTG1	11.0732	4.14393	4.51899	1.04427	0.617413	0.655041	1.90789	1.6246	1.64957
YWHAZ	5.12659	2.52275	3.52837	0.709829	0.401875	0.547574	1.68593	1.48156	1.57825
CSNK1D	2.67215	1.91057	1.89212	0.426861	0.281162	0.276948	1.49814	1.40144	1.39865
CSNK1E	2.08204	0.5544	0.940174	0.31849	-0.256177	-0.0267917	1.42622	1.04484	1.19707
HIPK2	0.984866	0.529609	0.562139	-0.00662266	-0.276045	-0.250156	1.21045	1.03165	1.04883
MPP5	0.771105	0.577943	0.529609	-0.112886	-0.238115	-0.276045	1.13993	1.05682	1.03165
AMOTL1	0.690159	0.347962	0.337042	-0.161051	-0.458469	-0.472316	1.10797	0.910584	0.901394
RPLP0	0.667574	0.334714	0.357992	-0.1755	-0.475326	-0.446126	1.09838	0.899396	0.918775
MYC	0.64797	0.416099	0.407254	-0.188445	-0.380803	-0.390135	1.08979	0.962127	0.955934
YWHAB	0.622006	0.4222	0.421031	-0.206206	-0.374481	-0.375685	1.078	0.966322	0.965523
TEAD1	0.575146	0.342221	0.391206	-0.240222	-0.465693	-0.407595	1.05542	0.905789	0.944347
YAP1	0.412367	0.189333	0.198746	-0.384716	-0.722773	-0.701701	0.95953	0.735176	0.749161
ZDHHC1	0.393381	0.234068	0.273953	-0.405186	-0.630658	-0.562324	0.945945	0.796309	0.841659
STK3	0.352086	0.258279	0.208627	-0.453351	-0.587912	-0.680629	0.91398	0.824678	0.763146
YWHAQ	0.321302	0.183773	0.160206	-0.493087	-0.735717	-0.795321	0.887609	0.726586	0.687029
PPP2R1	0.255607	0.152724	0.148445	-0.592427	-0.816092	-0.828435	0.821681	0.673244	0.665053
CCNE1	0.25349	0.11908	0.121413	-0.596039	-0.924162	-0.915733	0.819284	0.601523	0.607117
FAT1	0.245876	0.129318	0.111801	-0.609285	-0.88834	-0.951556	0.810494	0.625297	0.583343
LLGL2	0.245535	5.84823	0.171348	-0.609887	0.767024	-0.766121	0.810094	1.72389	0.706408
STK4	0.225313	0.0982772	0.114387	-0.647214	-1.00755	-0.941622	0.785321	0.546184	0.589936
WWC1	0.223291	0.0850821	0.0957887	-0.651128	-1.07016	-1.01869	0.782724	0.50463	0.538792
PRKCZ	0.178377	0.123793	0.107321	-0.748662	-0.907304	-0.969317	0.717995	0.612711	0.571556
DVL2	0.175312	0.0789455	0.10125	-0.756187	-1.10267	-0.994603	0.713001	0.483053	0.554775
SMAD1	0.164254	0.101532	0.0934929	-0.784484	-0.993399	-1.02922	0.694221	0.555574	0.5318
MOB1A	0.161209	0.0828704	0.0805484	-0.792612	-1.0816	-1.09394	0.688827	0.497038	0.488847
PPP2CB	0.155609	0.0841438	0.0774817	-0.807965	-1.07498	-1.1108	0.678639	0.501433	0.477659
TAOK1	0.144486	0.0458479	0.0639461	-0.840175	-1.33868	-1.19419	0.657262	0.326426	0.42232
PARD3	0.141023	0.0688691	0.0815032	-0.850711	-1.16198	-1.08883	0.65027	0.443697	0.492243
AJUBA	0.136597	0.106949	0.109272	-0.864558	-0.970822	-0.96149	0.64108	0.570557	0.57675
DIAPH2	0.132219	0.0887567	0.0659721	-0.878707	-1.0518	-1.18064	0.63169	0.516816	0.43131
PTPN14	0.129408	0.115583	0.111182	-0.888038	-0.937106	-0.953964	0.625497	0.592933	0.581745
POTEF	0.12345	0.0615542	0.0619823	-0.908509	-1.21074	-1.20773	0.611912	0.411332	0.41333
TAZ	0.112969	0.0631095	0.0567199	-0.94704	-1.19991	-1.24626	0.58634	0.418524	0.387758
IPO8	0.111028	0.0560555	0.0575915	-0.954566	-1.25138	-1.23964	0.581345	0.384362	0.392153
SAV1	0.105477	0.0567199	0.0706092	-0.976842	-1.24626	-1.15114	0.566562	0.387758	0.450889
TJP2	0.103665	0.0533636	0.0400793	-0.984368	-1.27275	-1.39708	0.561567	0.370177	0.287668
DLG1	0.101884	0.0445633	0.0569958	-0.991894	-1.35102	-1.24416	0.556573	0.318235	0.389157
AMOTL2	0.0915688	0.0490705	0.0482275	-1.03825	-1.30918	-1.31671	0.525806	0.346004	0.34101
YWHAE	0.0891884	0.0714957	0.0629784	-1.04969	-1.14572	-1.20081	0.518215	0.454485	0.417925
RERE	0.0851411	0.0273749	0.0433447	-1.06986	-1.56265	-1.36306	0.50483	0.177789	0.310243
TFRC	0.0818428	0.0373176	0.0332616	-1.08702	-1.42809	-1.47806	0.493442	0.267091	0.233927
LAST2	0.0766272	0.0333539	0.0398024	-1.11562	-1.47685	-1.40009	0.474463	0.234726	0.28567
MPDZ	0.0693	0.041149	0.0473333	-1.15927	-1.38564	-1.32483	0.445495	0.29526	0.335615
HMBS	0.068204	0.0548639	0.0459115	-1.16619	-1.26071	-1.33808	0.4409	0.378169	0.326825
TEAD4	0.0654256	0.0349879	0.0320174	-1.18425	-1.45608	-1.49461	0.428913	0.248511	0.222939
RASSF4	0.0615968	0.0245523	0.0263327	-1.21044	-1.60991	-1.5795	0.411532	0.146423	0.166601
TAOK2	0.0609597	0.0322848	0.0392001	-1.21496	-1.491	-1.40671	0.408535	0.225337	0.281275
TEAD2	0.0497555	0.0301646	0.0369828	-1.30316	-1.5205	-1.432	0.35	0.205758	0.264494
MOB1B	0.0474647	0.0275272	0.024231	-1.32363	-1.56024	-1.61563	0.336415	0.179387	0.142628
SCRIB	0.0467788	0.0256304	0.0221277	-1.32995	-1.59124	-1.65506	0.332219	0.15881	0.116456
PRKC1	0.0396098	0.0299147	0.0302064	-1.4022	-1.52411	-1.5199	0.284272	0.203361	0.206158
WWTR1	0.0376554	0.0269047	0.0227026	-1.42417	-1.57017	-1.64392	0.269688	0.172794	0.123848
LPP	0.0311851	0.022924	0.0156575	-1.50605	-1.63971	-1.80528	0.215348	0.126645	0.0167658
TSHZ1	0.0309268	0.0192233	0.0130031	-1.50967	-1.71617	-1.88595	0.21295	0.0759009	-0.0367753
LIMD1	0.0280666	0.0158871	0.0138497	-1.55181	-1.79896	-1.85856	0.184981	0.0209612	-0.0185953
LIX1L	0.0278728	0.016266	0.0112495	-1.55482	-1.78872	-1.94887	0.182983	0.0277538	-0.0785294
PPP2R2	0.0264241	0.0133409	0.0117272	-1.578	-1.87481	-1.93081	0.1676	-0.0293834	-0.0665426
TJP1	0.0253126	0.00992994	0.0132212	-1.59666	-2.00305	-1.87873	0.155214	-0.11449	-0.0319806
DCHS1	0.0244673	0.0163338	0.0109191	-1.61141	-1.78691	-1.96181	0.145424	0.0289525	-0.08712
LLGL1	0.022924	0.0122591	0.00903036	-1.63971	-1.91154	-2.04429	0.126645	-0.0537567	-0.14186
TAOK3	0.0212263	0.0096651	0.0123017	-1.67312	-2.01479	-1.91004	0.104469	-0.122281	-0.0527578
TEAD3	0.020546	0.0093294	0.00810484	-1.68727	-2.03015	-2.09126	0.0950798	-0.13247	-0.173026
AMOT	0.0184786	0.0274129	0.0161985	-1.73333	-1.56204	-1.79053	0.0645134	0.178188	0.0265551
RASSF2	0.0180607	0.017301	0.010518	-1.74326	-1.76193	-1.97807	0.0579206	0.0455342	-0.0979081
MST1	0.0159091	0.0177136	0.0150718	-1.79835	-1.75169	-1.82183	0.0213608	0.0523268	0.00577792
NPHP4	0.0142292	0.00859075	0.00634132	-1.84682	-2.06597	-2.19782	-0.0108039	-0.156244	-0.243748
LAST1	0.0126213	0.00971211	0.0116623	-1.8989	-2.01269	-1.93321	-0.0453659	-0.120883	-0.0681409
TBP	0.011195	0.00645217	0.0059951	-1.95098	-2.19029	-2.2222	-0.0799279	-0.238753	-0.25993
FJX1	0.0109191	0.0073604	0.00660146	-1.96181	-2.1331	-2.18036	-0.08712	-0.200795	-0.232161
CCNE2	0.00714426	0.00553577	0.00655131	-2.14604	-2.25682	-2.18367	-0.209386	-0.282905	-0.234358
CASP3	0.00579089	0.00706057	0.00442533	-2.23725	-2.15116	-2.35405	-0.269919	-0.212782	-0.347434
WTIP	0.00435836	0.00189446	0.00138107	-2.36068	-2.72252	-2.85978	-0.351829	-0.591965	-0.683065
TSHZ3	0.00373416	0.00220501	0.00155702	-2.42781	-2.65659	-2.80771	-0.39638	-0.548213	-0.648503
MAPK10	0.00367256	0.00222189	0.00149463	-2.43503	-2.65328	-2.82547	-0.401175	-0.546016	-0.66029
GPC5	0.000713895	0.00030774	0.000213423	-3.14637	-3.51182	-3.67076	-0.873256	-1.11579	-1.22127
CRB2	0.000460663	0.000230651	0.000168964	-3.33662	-3.63704	-3.77221	-0.999517	-1.1989	-1.2886
FAT4	0.000368002	0.000233062	0.000152595	-3.43415	-3.63253	-3.81646	-1.06425	-1.1959	-1.31797
PARD6G	0.000318151	0.00052369	0.000383098	-3.49737	-3.28093	-3.41669	-1.1062	-0.962558	-1.05266
CRB3	0.000231612	0.00022264	0.000170611	-3.63524	-3.6524	-3.76799	-1.1977	-1.20909	-1.2858
MEIS1	0.000145066	7.29365e-05	6.93858e-05	-3.83843	-4.13706	-4.15873	-1.33255	-1.53073	-1.54512
DCHS2	9.11751e-05	6.56885e-05	8.83751e-05	-4.04012	-4.18251	-4.05367	-1.4664	-1.5609	-1.47539
HMCN1	5.84677e-05	1.97608e-05	8.59542e-06	-4.23308	-4.7042	-5.06573	-1.59446	-1.90712	-2.14706
CRB1	5.15739e-05	3.32336e-05	1.92604e-05	-4.28757	-4.47842	-4.71533	-1.63062	-1.75728	-1.91451
WNT1	3.27079e-05	3.00766e-05	2.27938e-05	-4.48535	-4.52177	-4.64218	-1.76188	-1.78605	-1.86597
TP63	2.3144e-05	3.54201e-06	3.43086e-06	-4.63556	-5.45075	-5.4646	-1.86157	-2.40258	-2.41177
FAT2	2.04718e-05	3.88407e-06	1.4769e-06	-4.68884	-5.41071	-5.83065	-1.89693	-2.376	-2.6547
FAT3	6.55942e-06	6.1411e-07	8.87917e-08	-5.18313	-6.21175	-7.05163	-2.22497	-2.90762	-3.46501
NF2	2.44794e-06	2.97228e-06	1.42165e-06	-5.6112	-5.52691	-5.84721	-2.50906	-2.45312	-2.66569
B2M	2.21387e-06	4.6412e-07	4.6412e-07	-5.65485	-6.33337	-6.33337	-2.53803	-2.98833	-2.98833
TSHZ2	1.45052e-06	1.45052e-06	1.45052e-06	-5.83848	-5.83848	-5.83848	-2.65989	-2.65989	-2.65989

## Sheet: Heatmap SKOV3 Fig2
	Expression level			Log10			Z-Score
Target Name	SKOV3 EV	SKOV3 miR-30b	SKOV3 shMYPT1	SKOV3 EV	SKOV3 miR-30b	SKOV3 shMYPT1	SKOV3 EV	SKOV3 miR-30b	SKOV3 shMYPT1
ACTG1	3.73472	1.74352	1.31768	0.572258	0.241426	0.11981	2.21094	1.92831	1.82441
YWHAZ	2.58112	0.613017	0.685867	0.411809	-0.212527	-0.16376	2.07387	1.5405	1.58216
B2M	2.54206	0.0700243	8.75824e-05	0.405186	-1.15475	-4.05758	2.06821	0.735558	-1.74432
RPLP0	1.68296	1.12975	0.480297	0.226074	0.0529813	-0.31849	1.91519	1.76732	1.44997
YWHAB	0.84792	0.183519	0.126131	-0.0716451	-0.736319	-0.899177	1.66085	1.09302	0.953895
YWHAQ	0.532554	0.127185	0.150935	-0.273636	-0.895564	-0.82121	1.48829	0.956981	1.0205
FAT1	0.518351	0.0401905	0.0162547	-0.285376	-1.39588	-1.78902	1.47826	0.529566	0.193703
CSNK1D	0.469436	0.103378	0.0627605	-0.328424	-0.985572	-1.20231	1.44149	0.880087	0.694926
MOB1A	0.344363	0.0635484	0.0406669	-0.462984	-1.1969	-1.39076	1.32653	0.699555	0.533938
CSNK1E	0.330793	0.148857	0.0681567	-0.480444	-0.82723	-1.16649	1.31162	1.01536	0.725529
TEAD1	0.298127	0.0960547	0.0771067	-0.525598	-1.01748	-1.11291	1.27304	0.852827	0.771305
IPO8	0.289774	0.0349879	0.0135929	-0.537941	-1.45608	-1.86669	1.2625	0.478132	0.127354
TAOK1	0.251042	0.0291169	0.0170628	-0.600254	-1.53586	-1.76795	1.20926	0.409983	0.211705
DLG1	0.200267	0.0211823	0.00798219	-0.69839	-1.67403	-2.09788	1.12543	0.291942	-0.0701519
PTPN14	0.194387	0.0168279	0.00812735	-0.711334	-1.77397	-2.09005	1.11437	0.206562	-0.0634655
PPP2CB	0.194252	0.0570353	0.0297081	-0.711635	-1.24386	-1.52713	1.11411	0.659436	0.41744
TFRC	0.192109	0.0288557	0.0212853	-0.716451	-1.53977	-1.67192	1.11	0.406639	0.293742
TJP1	0.186081	0.0286167	0.0127886	-0.730299	-1.54338	-1.89318	1.09817	0.403553	0.104723
YAP1	0.181747	0.0716942	0.0412346	-0.740534	-1.14452	-1.38474	1.08942	0.744302	0.539081
HIPK2	0.160539	0.062717	0.0443784	-0.794418	-1.20261	-1.35283	1.04339	0.694669	0.566341
MPP5	0.141807	0.0590058	0.0518684	-0.848303	-1.22911	-1.2851	0.997356	0.672038	0.624204
PPP2R1	0.136882	0.0597466	0.0298526	-0.863655	-1.22369	-1.52502	0.984241	0.676667	0.419241
AJUBA	0.13603	0.0527385	0.0279308	-0.866364	-1.27787	-1.55392	0.981926	0.630376	0.394552
PARD3	0.135842	0.0188146	0.0110562	-0.866966	-1.7255	-1.95639	0.981412	0.247966	0.0507175
NF2	0.120993	0.00404681	2.19412e-05	-0.917238	-2.39289	-4.65874	0.938465	-0.322177	-2.25789
ZDHHC1	0.104821	0.0278921	0.021374	-0.979552	-1.55452	-1.67011	0.885231	0.394038	0.295285
DIAPH2	0.0916958	0.0194646	0.00885679	-1.03765	-1.71075	-2.05272	0.835597	0.260567	-0.0315765
SAV1	0.0913153	0.0334002	0.0228446	-1.03946	-1.47625	-1.64122	0.834054	0.460902	0.319973
WWTR1	0.077643	0.00671219	0.00269033	-1.1099	-2.17314	-2.57019	0.773877	-0.134444	-0.47365
TAOK2	0.0765741	0.0213148	0.0131481	-1.11592	-1.67132	-1.88114	0.768733	0.294256	0.11501
MPDZ	0.074687	0.0201092	0.00816122	-1.12676	-1.69661	-2.08825	0.759475	0.272654	-0.0619225
RERE	0.0727958	0.00916277	0.0044871	-1.13789	-2.03797	-2.34803	0.74996	-0.0189753	-0.283859
LAST1	0.0699273	0.0108512	0.00376535	-1.15535	-1.96452	-2.42419	0.735044	0.043774	-0.348923
PRKCZ	0.0696854	0.0261327	0.0184914	-1.15686	-1.58282	-1.73303	0.733758	0.369864	0.241537
LPP	0.0686784	0.013499	0.0047004	-1.16318	-1.8697	-2.32786	0.728358	0.124782	-0.266629
MYC	0.0683934	0.044749	0.0294416	-1.16499	-1.34922	-1.53104	0.726815	0.569427	0.414097
TBP	0.0671718	0.0121913	0.00491361	-1.17281	-1.91395	-2.3086	0.720128	0.0869783	-0.25017
WWC1	0.066893	0.0230994	0.0198324	-1.17462	-1.6364	-1.70263	0.718585	0.324088	0.267511
AMOTL1	0.0651993	0.026351	0.0223745	-1.18576	-1.5792	-1.65025	0.70907	0.37295	0.312258
STK4	0.0640348	0.020732	0.0124216	-1.19358	-1.68336	-1.90582	0.702384	0.28397	0.0939219
TEAD2	0.059788	0.0200396	0.00951883	-1.22339	-1.69811	-2.02142	0.676924	0.271368	-0.00483097
CASP3	0.0597466	0.00537694	0.00203748	-1.22369	-2.26947	-2.69091	0.676667	-0.216738	-0.576775
PRKC1	0.0532528	0.0142588	0.00741674	-1.27366	-1.84592	-2.12979	0.633977	0.145099	-0.0974118
SMAD1	0.0517248	0.00929712	0.00520459	-1.2863	-2.03165	-2.28361	0.623176	-0.0135747	-0.228825
MOB1B	0.0508362	0.026793	0.0144679	-1.29383	-1.57198	-1.83959	0.616746	0.379122	0.150499
STK3	0.048094	0.0141211	0.0110027	-1.31791	-1.85013	-1.9585	0.596173	0.141498	0.0489173
PPP2R2	0.0468437	0.0138882	0.00877126	-1.32935	-1.85736	-2.05694	0.5864	0.135326	-0.0351769
LIX1L	0.0404421	0.0110332	0.00393069	-1.39317	-1.9573	-2.40553	0.531881	0.049946	-0.332979
DVL2	0.0402184	0.0369828	0.013946	-1.39558	-1.432	-1.85555	0.529823	0.498706	0.136869
TSHZ1	0.0320618	0.00302468	0.000721857	-1.49401	-2.51932	-3.14155	0.445729	-0.430188	-0.961757
YWHAE	0.0302693	0.017579	0.0147617	-1.519	-1.755	-1.83086	0.424384	0.222764	0.157957
TEAD4	0.027337	0.015051	0.0193839	-1.56325	-1.82244	-1.71256	0.38658	0.165158	0.259024
POTEF	0.0251378	0.00883227	0.00254697	-1.59967	-2.05393	-2.59398	0.355463	-0.0326052	-0.493966
MEIS1	0.023914	0.00120146	0.000618474	-1.62135	-2.92029	-3.20868	0.336947	-0.772737	-1.01911
HMBS	0.0224833	0.00767297	0.00660146	-1.64814	-2.11504	-2.18036	0.314059	-0.0848105	-0.140616
LLGL2	0.0224833	0.0132029	0.0101175	-1.64814	-1.87933	-1.99493	0.314059	0.116553	0.0177999
TEAD3	0.0214928	0.0106058	0.00451518	-1.66771	-1.97446	-2.34532	0.297343	0.0352874	-0.281545
CCNE1	0.0212705	0.0372917	0.020207	-1.67222	-1.42839	-1.6945	0.293485	0.501792	0.274454
MAPK10	0.0204041	0.00153558	0.000388446	-1.69028	-2.81373	-3.41067	0.278055	-0.6817	-1.19167
TAOK3	0.0193302	0.00408061	0.00208751	-1.71376	-2.38928	-2.68037	0.257996	-0.319091	-0.567774
HMCN1	0.0182621	0.000883183	7.62977e-05	-1.73845	-3.05395	-4.11749	0.236908	-0.88692	-1.7955
LAST2	0.017313	0.00766765	0.00357708	-1.76163	-2.11534	-2.44647	0.217106	-0.0850677	-0.367953
LIMD1	0.0171815	0.00544444	0.00458774	-1.76494	-2.26405	-2.3384	0.214277	-0.212109	-0.27563
TAZ	0.0162885	0.0109874	0.00508689	-1.78812	-1.9591	-2.29355	0.194475	0.048403	-0.237312
SCRIB	0.013735	0.00708508	0.00721392	-1.86217	-2.14966	-2.14183	0.131211	-0.114385	-0.107699
CRB3	0.0134244	0.00128948	7.26841e-05	-1.87211	-2.88959	-4.13856	0.122725	-0.746506	-1.8135
DCHS1	0.0131755	0.00428645	0.00188659	-1.88023	-2.3679	-2.72432	0.115781	-0.300832	-0.60532
AMOTL2	0.0123444	0.0228922	0.0111718	-1.90853	-1.64031	-1.95188	0.0916074	0.320745	0.0545751
LLGL1	0.0121913	0.00693927	0.00317066	-1.91395	-2.15869	-2.49885	0.0869783	-0.1221	-0.412701
TJP2	0.0105618	0.0112495	0.0074735	-1.97626	-1.94887	-2.12648	0.0337444	0.0571467	-0.0945829
NPHP4	0.00972558	0.00311403	0.0011094	-2.01208	-2.50668	-2.95491	0.00314127	-0.419387	-0.802312
WTIP	0.00864451	0.00312268	0.00140716	-2.06326	-2.50547	-2.85166	-0.0405774	-0.418359	-0.714103
CCNE2	0.00826941	0.00411184	0.00425684	-2.08253	-2.38596	-2.37091	-0.0570363	-0.316263	-0.303404
RASSF4	0.00598265	0.0088937	0.00257538	-2.22311	-2.05092	-2.58916	-0.177134	-0.0300335	-0.489852
MST1	0.00363457	0.00352051	0.000393595	-2.43955	-2.45339	-3.40495	-0.362039	-0.373868	-1.18678
FAT3	0.00254345	8.03134e-05	2.00634e-06	-2.59458	-4.09521	-5.69759	-0.494481	-1.77647	-3.14538
RASSF2	0.00180098	0.00199002	0.00110863	-2.74449	-2.70114	-2.95521	-0.622551	-0.585518	-0.802569
FAT4	0.00169559	0.00146895	0.000534323	-2.77068	-2.83299	-3.2722	-0.644924	-0.698158	-1.07337
AMOT	0.00158863	0.00260229	0.00122246	-2.79898	-2.58464	-2.91277	-0.669098	-0.485994	-0.766308
TP63	0.00116456	2.75995e-05	1.18803e-06	-2.93384	-4.5591	-5.92517	-0.78431	-2.17277	-3.3398
TSHZ3	0.00109261	0.00210787	0.0010124	-2.96153	-2.67616	-2.99465	-0.80797	-0.564173	-0.836258
FAT2	0.00106495	5.60471e-05	5.89123e-06	-2.97267	-4.25145	-5.22979	-0.817485	-1.90994	-2.74574
PARD6G	0.000795418	0.000422137	0.000194357	-3.0994	-3.37455	-3.7114	-0.925753	-1.16081	-1.44858
FJX1	0.000432204	0.00238466	0.00258074	-3.36431	-2.62257	-2.58826	-1.15206	-0.518397	-0.48908
GPC5	0.000402702	0.000503752	0.000204587	-3.39502	-3.29778	-3.68912	-1.17829	-1.09523	-1.42955
CRB2	0.000186699	0.000222177	2.32889e-05	-3.72886	-3.6533	-4.63285	-1.46349	-1.39894	-2.23577
DCHS2	0.000123432	0.000711919	0.00018311	-3.90857	-3.14757	-3.73729	-1.61702	-0.9669	-1.47069
CRB1	6.84305e-05	0.000145974	4.0434e-06	-4.16475	-3.83572	-5.39325	-1.83587	-1.55479	-2.88538
TSHZ2	3.55448e-05	1.33753e-06	1.33753e-06	-4.44922	-5.8737	-5.8737	-2.0789	-3.29582	-3.29582
WNT1	2.48027e-07	8.99778e-06	2.97228e-06	-6.6055	-5.04586	-5.52691	-3.921	-2.58861	-2.99956

## Sheet: FigS1
	Log10 fold-change				Log10 fold-change				Log10 fold-change
Target Name	ES-2 miR-30b	ES-2 shMYPT1		Target Name	OVCAR8 miR-30b	OVCAR8 shMYPT1		Target Name	SKOV3 miR-30b	SKOV3 shMYPT1
ACTG1	-0.588815	-0.801041		ACTG1	-0.426861	-0.389232		ACTG1	-0.330832	-0.452448
YWHAZ	1.71196	-0.448836		YWHAZ	-0.307954	-0.162255		AJUBA	-0.411508	-0.687553
CSNK1D	-0.889845	-1.58372		CSNK1D	-0.145699	-0.149913		AMOT	0.214333	-0.113789
CSNK1E	-0.829639	-1.3733		CSNK1E	-0.574666	-0.345281		AMOTL1	-0.393446	-0.464489
HIPK2	-0.902488	-1.51117		HIPK2	-0.269422	-0.243533		AMOTL2	0.268218	-0.0433483
MPP5	-0.752575	-1.35403		MPP5	-0.125228	-0.163158		B2M	-1.55994	-4.46277
AMOTL1	-1.08973	-1.74989		AMOTL1	-0.297418	-0.311265		CASP3	-1.04578	-1.46722
RPLP0	-0.435891	-0.220655		RPLP0	-0.299826	-0.270626		CCNE1	0.243834	-0.0222762
MYC	-0.882018	-1.47956		MYC	-0.192358	-0.20169		CCNE2	-0.303438	-0.288387
YWHAB	-0.537038	-0.670695		YWHAB	-0.168276	-0.16948		CRB1	0.329026	-1.2285
TEAD1	-0.674909	-1.05662		TEAD1	-0.225471	-0.167373		CRB2	0.0755585	-0.903993
YAP1	-0.870579	-1.23663		YAP1	-0.338057	-0.316985		CRB3	-1.01748	-2.26645
ZDHHC1	-0.872385	-1.37119		ZDHHC1	-0.225471	-0.157138		CSNK1D	-0.657148	-0.87389
STK3	-1.09996	-1.62436		STK3	-0.13456	-0.227278		CSNK1E	-0.346787	-0.686047
YWHAQ	-0.561421	-0.51145		YWHAQ	-0.24263	-0.302234		DCHS1	-0.487669	-0.844088
PPP2R1	-0.500312	-1.10629		PPP2R1	-0.223665	-0.236008		DCHS2	0.761004	0.171286
CCNE1	-0.955469	-1.27155		CCNE1	-0.328123	-0.319694		DIAPH2	-0.673103	-1.01507
FAT1	-0.829037	-1.35343		FAT1	-0.279055	-0.342271		DLG1	-0.975638	-1.39949
LLGL2	-1.08642	-1.7818		LLGL2	1.37691	-0.156235		DVL2	-0.0364246	-0.459974
STK4	-0.787494	-1.34109		STK4	-0.360333	-0.294407		FAT1	-1.1105	-1.50364
WWC1	-0.831445	-1.19238		WWC1	-0.419034	-0.367558		FAT2	-1.27878	-2.25712
PRKCZ	-0.902187	-1.53525		PRKCZ	-0.158643	-0.220655		FAT3	-1.50063	-3.10302
DVL2	-0.621928	-1.28299		DVL2	-0.346486	-0.238416		FAT4	-0.0623132	-0.501516
SMAD1	-0.751973	-1.62315		SMAD1	-0.208915	-0.244737		FJX1	0.741738	0.776055
MOB1A	-0.646612	-0.749264		MOB1A	-0.288989	-0.301331		GPC5	0.0972327	-0.294106
PPP2CB	-0.596942	-0.779066		PPP2CB	-0.267014	-0.302836		HIPK2	-0.408197	-0.558411
TAOK1	-0.819404	-1.12856		TAOK1	-0.498506	-0.354011		HMBS	-0.466898	-0.532221
PARD3	-0.674608	-1.18064		PARD3	-0.311265	-0.238115		HMCN1	-1.3155	-2.37904
AJUBA	-0.52319	-0.864558		AJUBA	-0.106264	-0.0969317		IPO8	-0.918141	-1.32875
DIAPH2	-0.706818	-1.24446		DIAPH2	-0.173092	-0.301933		LAST1	-0.809169	-1.26884
PTPN14	-0.831144	-1.45879		PTPN14	-0.0490679	-0.0659256		LAST2	-0.35371	-0.684843
POTEF	-1.06595	-1.93592		POTEF	-0.302234	-0.299224		LIMD1	-0.499108	-0.573462
TAZ	-0.977143	-1.52171		TAZ	-0.252865	-0.299224		LIX1L	-0.56413	-1.01236
IPO8	-0.700798	-1.15987		IPO8	-0.296816	-0.285075		LLGL1	-0.244737	-0.584901
SAV1	-0.54938	-0.841379		SAV1	-0.269422	-0.174296		LLGL2	-0.231191	-0.346787
TJP2	-0.817898	-1.32453		TJP2	-0.288387	-0.412712		LPP	-0.706517	-1.16469
DLG1	-0.616208	-1.08672		DLG1	-0.359129	-0.252263		MAPK10	-1.12344	-1.72039
AMOTL2	-0.515062	-1.16469		AMOTL2	-0.270927	-0.278453		MEIS1	-1.29894	-1.58733
YWHAE	-0.485862	-1.01748		YWHAE	-0.0960286	-0.151117		MOB1A	-0.733911	-0.927774
RERE	-0.783581	-1.47565		RERE	-0.492786	-0.293203		MOB1B	-0.278152	-0.545767
TFRC	0	-0.750769		TFRC	-0.341067	-0.391038		MPDZ	-0.56985	-0.96149
LAST2	-0.972929	-1.68938		LAST2	-0.361236	-0.284473		MPP5	-0.380803	-0.436795
MPDZ	-0.708926	-1.04126		MPDZ	-0.226375	-0.165566		MST1	-0.0138474	-0.965403
HMBS	-0.982562	-1.38022		HMBS	-0.0945234	-0.171888		MYC	-0.18423	-0.366052
TEAD4	-0.639087	-0.717354		TEAD4	-0.27183	-0.310362		NF2	-1.47565	-3.7415
RASSF4	-0.974133	-1.7547		RASSF4	-0.399467	-0.369063		NPHP4	-0.494592	-0.942826
TAOK2	-0.625239	-0.907906		TAOK2	-0.276045	-0.191756		PARD3	-0.858538	-1.08943
TEAD2	-0.658955	-0.900381		TEAD2	-0.217344	-0.128841		PARD6G	-0.275141	-0.611994
MOB1B	-0.611693	-0.74234		MOB1B	-0.23661	-0.291999		POTEF	-0.454254	-0.994302
SCRIB	-0.772744	-1.08401		SCRIB	-0.261294	-0.325112		PPP2CB	-0.532221	-0.81549
PRKC1	-0.689058	-0.85914		PRKC1	-0.121917	-0.117703		PPP2R1	-0.360032	-0.661363
WWTR1	-0.631862	-1.27035		WWTR1	-0.146	-0.219752		PPP2R2	-0.528007	-0.727589
LPP	-0.662266	-1.00875		LPP	-0.133657	-0.299224		PRKC1	-0.572258	-0.856129
TSHZ1	-1.0804	-1.81491		TSHZ1	-0.206507	-0.376287		PRKCZ	-0.425957	-0.576171
LIMD1	-0.784183	-1.09876		LIMD1	-0.247146	-0.30675		PTPN14	-1.06264	-1.37872
LIX1L	-0.740835	-0.941622		LIX1L	-0.2339	-0.394048		RASSF2	0.0433483	-0.210721
PPP2R2	-0.589718	-0.825123		PPP2R2	-0.296816	-0.352807		RASSF4	0.172189	-0.366052
TJP1	-0.341368	-0.239921		TJP1	-0.40639	-0.282065		RERE	-0.90008	-1.21014
DCHS1	-0.813985	-1.42387		DCHS1	-0.1755	-0.350399		RPLP0	-0.173092	-0.544563
LLGL1	-0.527706	-1.11502		LLGL1	-0.27183	-0.404584		SAV1	-0.436795	-0.601759
TAOK3	-0.936805	-1.17372		TAOK3	-0.341669	-0.236911		SCRIB	-0.287484	-0.279657
TEAD3	-0.744146	-0.861548		TEAD3	-0.342873	-0.403982		SMAD1	-0.74535	-0.997312
AMOT	-0.611392	-1.30918		AMOT	0.171286	-0.0571957		STK3	-0.532221	-0.640592
RASSF2	-0.50573	-1.16107		RASSF2	-0.0186639	-0.234803		STK4	-0.489776	-0.712237
MST1	-0.981057	-1.59576		MST1	0.0466596	-0.0234803		TAOK1	-0.935601	-1.1677
NPHP4	-0.656847	-1.33296		NPHP4	-0.21915	-0.351001		TAOK2	-0.5554	-0.765218
LAST1	-0.54938	-0.605371		LAST1	-0.113789	-0.0343174		TAOK3	-0.675511	-0.966607
TBP	-0.700196	-0.546068		TBP	-0.239319	-0.271228		TAZ	-0.170985	-0.505429
FJX1	-0.454856	-0.881416		FJX1	-0.171286	-0.218548		TBP	-0.741136	-1.13579
CCNE2	-0.364848	-0.273937		CCNE2	-0.110779	-0.0376287		TEAD1	-0.491883	-0.58731
CASP3	-0.791107	-0.565936		CASP3	0.0860946	-0.1168		TEAD2	-0.474724	-0.798031
WTIP	-0.415421	-0.980455		WTIP	-0.361838	-0.499108		TEAD3	-0.30675	-0.677619
TSHZ3	-0.991292	-0.960587		TSHZ3	-0.228783	-0.3799		TEAD4	-0.259187	-0.149311
MAPK10	0	-1.64694		MAPK10	-0.218247	-0.390436		TFRC	-0.823317	-0.955469
GPC5	-1.02561	-1.48047		GPC5	-0.36545	-0.524394		TJP1	-0.813082	-1.16288
CRB2	-0.776958	-2.58163		CRB2	-0.300428	-0.43559		TJP2	0.0273937	-0.150214
FAT4	-0.478036	-0.468704		FAT4	-0.198379	-0.382308		TP63	-1.62526	-2.99134
PARD6G	-0.600856	-1.77758		PARD6G	0.216441	0.080676		TSHZ1	-1.02531	-1.64754
CRB3	-0.299525	-1.1692		CRB3	-0.0171587	-0.132754		TSHZ2	-1.42447	-1.23936
MEIS1	-0.469306	-0.698089		MEIS1	-0.298622	-0.320296		TSHZ3	0.285376	-0.0331133
DCHS2	-0.898876	-0.782979		DCHS2	-0.142387	-0.0135463		WNT1	1.55964	1.07859
HMCN1	-0.859742	-1.39347		HMCN1	-0.471112	-0.832649		WTIP	-0.442213	-0.788398
CRB1	-1.53947	-2.10902		CRB1	-0.190853	-0.427764		WWC1	-0.46178	-0.528007
WNT1	-1.55693	-1.95067		WNT1	-0.0364246	-0.156837		WWTR1	-1.06324	-1.4603
TP63	-1.41213	-1.62044		TP63	-0.815189	-0.829037		YAP1	-0.403982	-0.644204
FAT2	-0.405186	-2.11504		FAT2	-0.72187	-1.14181		YWHAB	-0.664674	-0.827531
FAT3	-0.288989	-1.26463		FAT3	-1.02862	-1.86849		YWHAE	-0.236008	-0.311867
NF2	-0.192057	-0.568345		NF2	0.0842884	-0.236008		YWHAQ	-0.621928	-0.547574
B2M	-0.63126	-1.0217		B2M	-0.678522	-0.678522		YWHAZ	-0.624336	-0.575569
TSHZ2	0	0		TSHZ2	0	0		ZDHHC1	-0.574967	-0.690563
